# Supplementary material for: Rendering classical hydrophilic enantiopure Werner salts [M(en)3]n+nX−lipophilic (M/n= Cr/3, Co/3, Rh/3, Ir/3, Pt/4); new chiral hydrogen bond donor catalysts and enantioselectivities as a function of metal and charge
Source: Royal Society of Chemistry journal article supplement (doi:10.1039/d0dt00523a), 2020-01-01
Supplement: d0dt00523a1.pdf [file d0dt00523a1.pdf]

ELECTRONIC SUPPLEMENTARY INFORMATION

for

Rendering Classical Hydrophilic Enantiopure Werner Salts  $[M(en)_3]^{n+}$   
 $nX^-$  Lipophilic ( $M/n = Cr/3, Co/3, Rh/3, Ir/3, Pt/4$ ); New Chiral  
Hydrogen Bond Donor Catalysts and Enantioselectivities as a Function  
of Metal and Charge

**William J. Maximuck,<sup>a</sup> Carola Ganzmann,<sup>b</sup> Scheherzad Alvi,<sup>a</sup> Karan R. Hooda,<sup>a</sup>  
and John A. Gladysz<sup>\*a</sup>**

<sup>a</sup>Department of Chemistry, Texas A&M University, P.O. Box 30012, College Station, Texas  
77842-3012, USA. E-mail: [gladysz@mail.chem.tamu.edu](mailto:gladysz@mail.chem.tamu.edu)

<sup>b</sup>Institut für Organische Chemie and Interdisciplinary Center for Molecular Materials Friedrich-  
Alexander-Universität Erlangen-Nürnberg, Henkestraße 42, 91054 Erlangen, Germany

## Experimental Section (continued)

$\Delta$ -[Cr(en)<sub>3</sub>]<sup>3+</sup> 3BAr<sub>f</sub><sup>-</sup>.  $\Delta$ -[Cr(en)<sub>3</sub>]<sup>3+</sup> 3Cl<sup>-</sup>·1.6H<sub>2</sub>O (0.0228 g, 0.0620 mmol),<sup>s1</sup> H<sub>2</sub>O (15 mL), CH<sub>2</sub>Cl<sub>2</sub> (15 mL), and Na<sup>+</sup> BAr<sub>f</sub><sup>-</sup> (0.1650 g, 0.1861 mmol) were combined in a procedure analogous to that for  $\Lambda$ -[Cr(en)<sub>3</sub>]<sup>3+</sup> 3BAr<sub>f</sub><sup>-</sup>. An identical workup gave  $\Delta$ -[Cr(en)<sub>3</sub>]<sup>3+</sup> 3BAr<sub>f</sub><sup>-</sup>·14H<sub>2</sub>O as a canary yellow solid (0.1742 g, 0.05667 mmol, 91%) that was stored at -35 °C to slow decomposition. Anal. Calcd. for C<sub>102</sub>H<sub>60</sub>B<sub>3</sub>CrF<sub>72</sub>N<sub>6</sub>·14H<sub>2</sub>O (3074.17): C 39.85, H 2.89, N 2.73; found C 40.04, H 2.71, N 2.49. The thermal behavior and IR and UV-vis spectra were identical to those of the enantiomer (*see experimental procedure in the main text*).

$\Delta$ -[Co(en)<sub>3</sub>]<sup>3+</sup> 3BAr<sub>f</sub><sup>-</sup>. A round bottom flask was charged with a colorless solution of Na<sup>+</sup> BAr<sub>f</sub><sup>-</sup> (0.494 g, 0.557 mmol) in CH<sub>2</sub>Cl<sub>2</sub> (25 mL). Then a solution of  $\Delta$ -[Co(en)<sub>3</sub>]<sup>3+</sup> 3I<sup>-</sup>·H<sub>2</sub>O<sup>s2</sup> (0.119 g, 0.186 mmol) in water (20 mL) was added. The heterogeneous mixture was vigorously stirred for 10 min. The now orange CH<sub>2</sub>Cl<sub>2</sub> phase was separated from the aqueous phase and the CH<sub>2</sub>Cl<sub>2</sub> was allowed to evaporate in a fume hood overnight to give  $\Delta$ -[Co(en)<sub>3</sub>]<sup>3+</sup> 3BAr<sub>f</sub><sup>-</sup>·14H<sub>2</sub>O as an orange solid (0.501 g, 0.163 mmol, 87%). Anal. Calcd. for C<sub>102</sub>H<sub>60</sub>B<sub>3</sub>CoF<sub>72</sub>N<sub>6</sub>·14H<sub>2</sub>O (3081.07): C, 39.76; H, 2.88; N, 2.73; found: C, 39.87; H, 2.77; N, 2.66. The thermal behavior and NMR (<sup>1</sup>H, <sup>13</sup>C{<sup>1</sup>H}), IR, and UV-vis spectra were identical to those of the enantiomer (*see experimental procedure in the main text*).

$\Delta$ -[Rh(en)<sub>3</sub>]<sup>3+</sup> 3BAr<sub>f</sub><sup>-</sup>.  $\Delta$ -[Rh(en)<sub>3</sub>]<sup>3+</sup> 3Cl<sup>-</sup>·2.3H<sub>2</sub>O (0.0204 g, 0.0473 mmol),<sup>s1b</sup> H<sub>2</sub>O (10 mL), CH<sub>2</sub>Cl<sub>2</sub> (10 mL), and Na<sup>+</sup> BAr<sub>f</sub><sup>-</sup> (0.1257 g, 0.1418 mmol) were combined in a procedure analogous to that for  $\Lambda$ -[Rh(en)<sub>3</sub>]<sup>3+</sup> 3BAr<sub>f</sub><sup>-</sup>. An identical workup gave  $\Delta$ -[Rh(en)<sub>3</sub>]<sup>3+</sup> 3BAr<sub>f</sub><sup>-</sup>·11.5H<sub>2</sub>O as an ivory solid (0.1407 g, 0.04568 mmol, 97%), Anal. Calcd. for C<sub>102</sub>H<sub>60</sub>B<sub>3</sub>F<sub>72</sub>N<sub>6</sub>Rh·11.5H<sub>2</sub>O (3080.04): C 39.78, H 2.72, N 2.73; found C 40.25, H 2.68, N 2.73. The thermal behavior and NMR (<sup>1</sup>H, <sup>13</sup>C{<sup>1</sup>H}), IR, and UV-vis spectra were identical to those of the enantiomer (*see experimental procedure in the main text*).

$\Delta$ -[Ir(en)<sub>3</sub>]<sup>3+</sup> 3BAr<sub>f</sub><sup>-</sup>.  $\Delta$ -[Ir(en)<sub>3</sub>]<sup>3+</sup> 3Cl<sup>-</sup>·2H<sub>2</sub>O (0.0236 g, 0.0458 mmol),<sup>s3</sup> H<sub>2</sub>O (15 mL), CH<sub>2</sub>Cl<sub>2</sub> (15 mL), and Na<sup>+</sup> BAr<sub>f</sub><sup>-</sup> (0.1219 g, 0.1376 mmol) were combined in a procedure analogous to that for  $\Lambda$ -[Ir(en)<sub>3</sub>]<sup>3+</sup> 3BAr<sub>f</sub><sup>-</sup>. An identical workup gave  $\Delta$ -[Ir(en)<sub>3</sub>]<sup>3+</sup> 3BAr<sub>f</sub><sup>-</sup>·9-

H<sub>2</sub>O as a white solid (0.1391 g, 0.04452 mmol, 97%). Anal. Calcd. for C<sub>102</sub>H<sub>60</sub>B<sub>3</sub>F<sub>72</sub>·IrN<sub>6</sub>·9H<sub>2</sub>O (3124.31): C 39.21, H 2.52, N 2.69; found C 39.10, H 2.53, N 2.72. The thermal behavior and NMR (<sup>1</sup>H, <sup>13</sup>C{<sup>1</sup>H}), IR, and UV-vis spectra were identical to those of the enantiomer (*see experimental procedure in the main text*).

$\Delta$ -[Pt(en)<sub>3</sub>]<sup>4+</sup> 4BAr<sub>f</sub><sup>-</sup>.  $\Delta$ -[Pt(en)<sub>3</sub>]<sup>4+</sup> 4Cl<sup>-</sup>·2H<sub>2</sub>O (0.0180 g, 0.0325 mmol),<sup>s4</sup> H<sub>2</sub>O (10 mL), CH<sub>2</sub>Cl<sub>2</sub> (10 mL), and Na<sup>+</sup> BAr<sub>f</sub><sup>-</sup> (0.1153 g, 0.1301 mmol) were combined in a procedure analogous to that for  $\Lambda$ -[Pt(en)<sub>3</sub>]<sup>4+</sup> 4BAr<sub>f</sub><sup>-</sup>. An identical workup gave  $\Delta$ -[Pt(en)<sub>3</sub>]<sup>4+</sup> 4BAr<sub>f</sub><sup>-</sup>·17H<sub>2</sub>O as a pale yellow solid (0.1280 g, 0.03096 mmol, 95%). Anal. Calcd. for C<sub>134</sub>H<sub>72</sub>B<sub>4</sub>F<sub>96</sub>·N<sub>6</sub>Pt·17H<sub>2</sub>O (4134.52): C 38.93, H 2.58, N 2.03; found C 39.05, H 2.48, N 2.02. The thermal behavior and NMR (<sup>1</sup>H, <sup>13</sup>C{<sup>1</sup>H}), IR, and UV-vis spectra were identical to those of the enantiomer (*see experimental procedure in the main text*).

**Thermal experiments (Table 1). A.** An open capillary was charged with *ca.* 0.008 g of the salt and inserted into an Optimelt MPA 100 instrument. The sample was heated from 30.0 °C to the temperature listed in column 3 of Table 1 at 10.0 °C/min, and then allowed to cool to room temperature before dissolution in acetone-*d*<sub>6</sub> for <sup>1</sup>H NMR analysis. **B.** The other experiments employed either a TA Instruments Q50 TGA, using 0.010-0.015 g samples that were heated from 30.0 to 500.0 °C at 10.0 °C/min, or a TA Instruments Q20 DSC, using 0.005-0.010 g samples that were heated from 25.0 °C to 50 °C beyond their liquefaction temperature at 10.0 °C/min.

### References

(s1) (a) Gillard, R. D.; Mitchell, P. R. Tris(diamine)chromium(III) Salts. *Inorg. Synth.* **1972**, *13*, 184-186. (b) Galsbøl, F. Resolution of Tris(ethylenediamine)-rhodium(III) and -chromium(III) Chloride by Means of (+)-Tartrate. *Inorg. Synth.* **1970**, *12*, 269-280.

(s2) Broomhead, J. A.; Dwyer, F. P.; Hogarth, J. W. Resolution of the Tris(ethylenediamine)cobalt(III) Ion. *Inorg. Synth.* **1960**, *6*, 183-186.

(s3) Galsbøl, F.; Rasmussen, B. S. The preparation, resolution, and characterization of tris(1,2-ethanediamine)iridium(III) complexes. *Acta Chem. Scand.* **1982**, *A36*, 83-87.

(s4) (a) Werner, A. Über Spiegelbildisomerie bei Platinverbindungen I. *Vierteljahresschr. Naturforsch. Ges. Zürich* **1917**, *62*, 553-564. (b) Giedt, D. C.; Nyman, C. J. Tris(ethylenediamine)platinum(IV) Chloride. *Inorg. Synth.* **1966**, *8*, 239-241.

**Representative HPLC traces used for determination of ee values.**

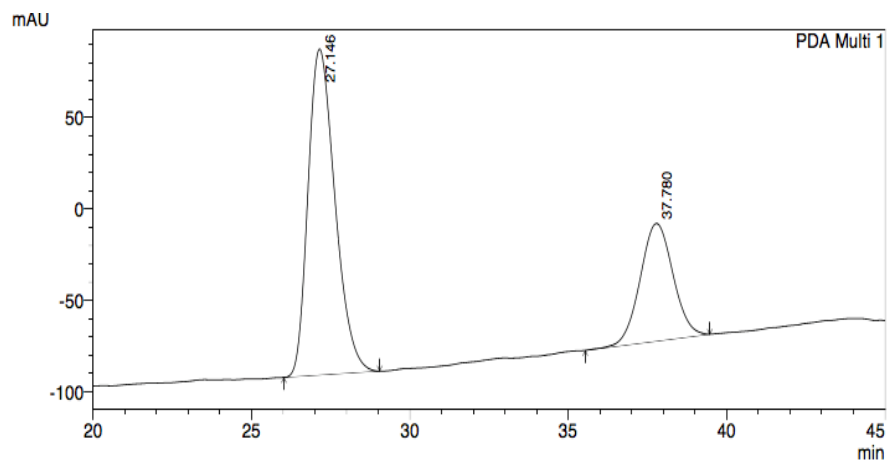

PeakTable

| Peak# | Ret. Time | Area     | Height | Area %  | Height % |
|-------|-----------|----------|--------|---------|----------|
| 1     | 27.146    | 10569265 | 178400 | 69.453  | 73.470   |
| 2     | 37.780    | 4648531  | 64420  | 30.547  | 26.530   |
| Total |           | 15217796 | 242820 | 100.000 | 100.000  |

**Figure s1.** HPLC trace for **1** in Chart 1, entry 5.

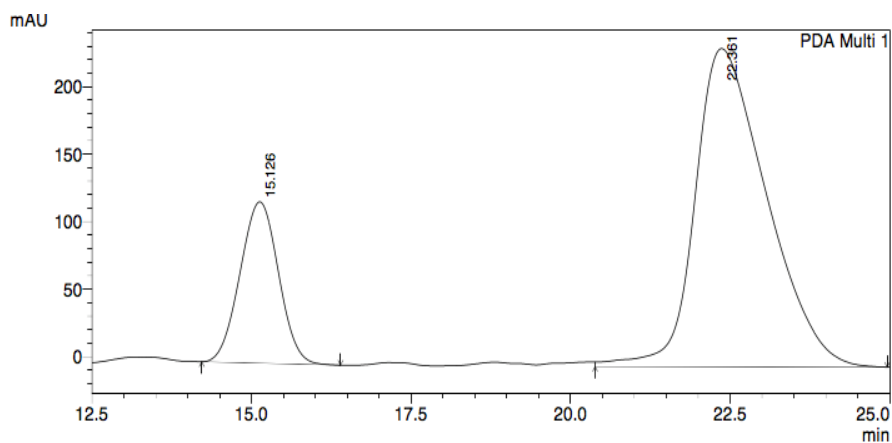

PeakTable

| Peak# | Ret. Time | Area     | Height | Area %  | Height % |
|-------|-----------|----------|--------|---------|----------|
| 1     | 15.126    | 5007507  | 119434 | 21.386  | 33.636   |
| 2     | 22.361    | 18406889 | 235643 | 78.614  | 66.364   |
| Total |           | 23414395 | 355077 | 100.000 | 100.000  |

**Figure s2.** HPLC trace for **2** in Chart 2, entry 5.

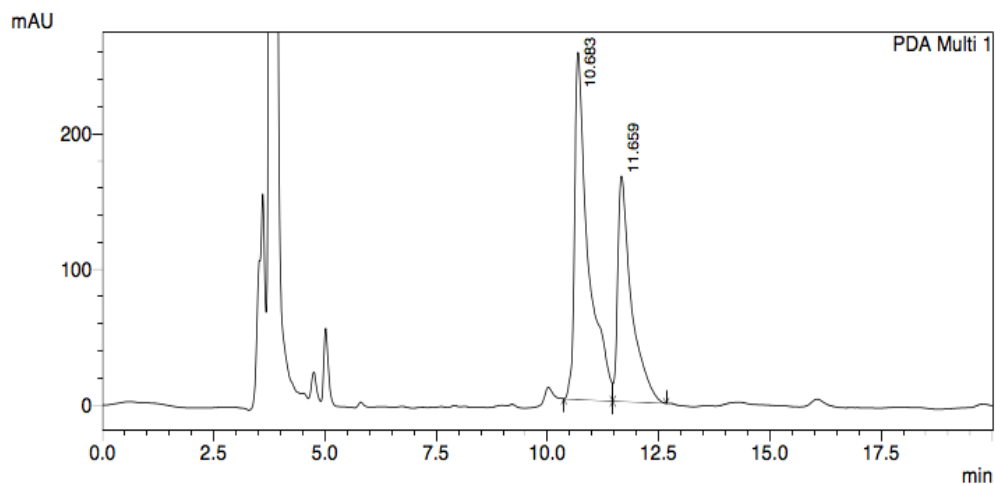

PeakTable

| Peak# | Ret. Time | Area    | Height | Area %  | Height % |
|-------|-----------|---------|--------|---------|----------|
| 1     | 10.683    | 5453817 | 255985 | 60.376  | 60.643   |
| 2     | 11.659    | 3579281 | 166131 | 39.624  | 39.357   |
| Total |           | 9033098 | 422116 | 100.000 | 100.000  |

Figure s3. HPLC trace for **3** in Chart 3, entry 6.

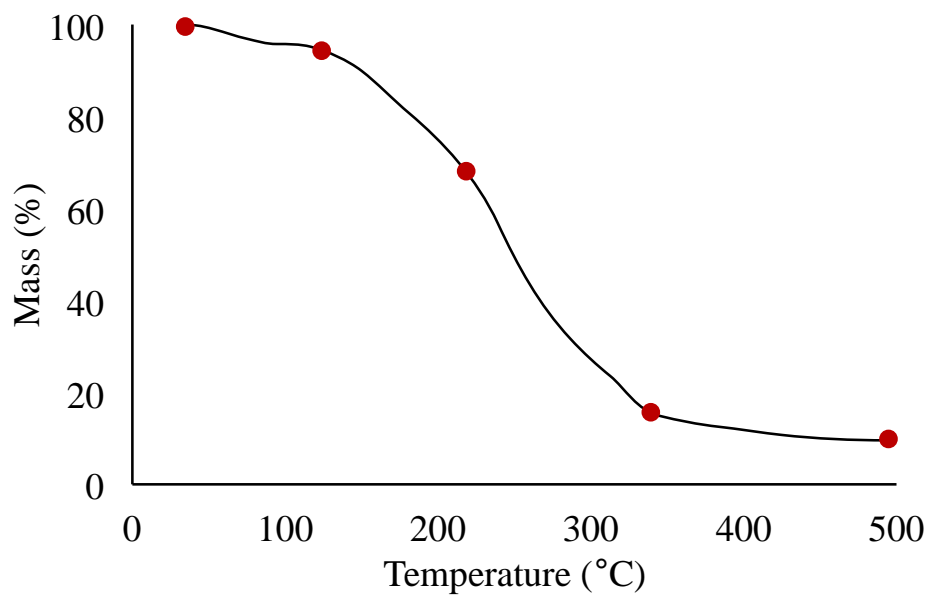

Figure s4. TGA trace for  $\Lambda$ -[Cr(en)<sub>3</sub>]<sup>3+</sup> 3BAR<sub>f</sub><sup>-</sup>.

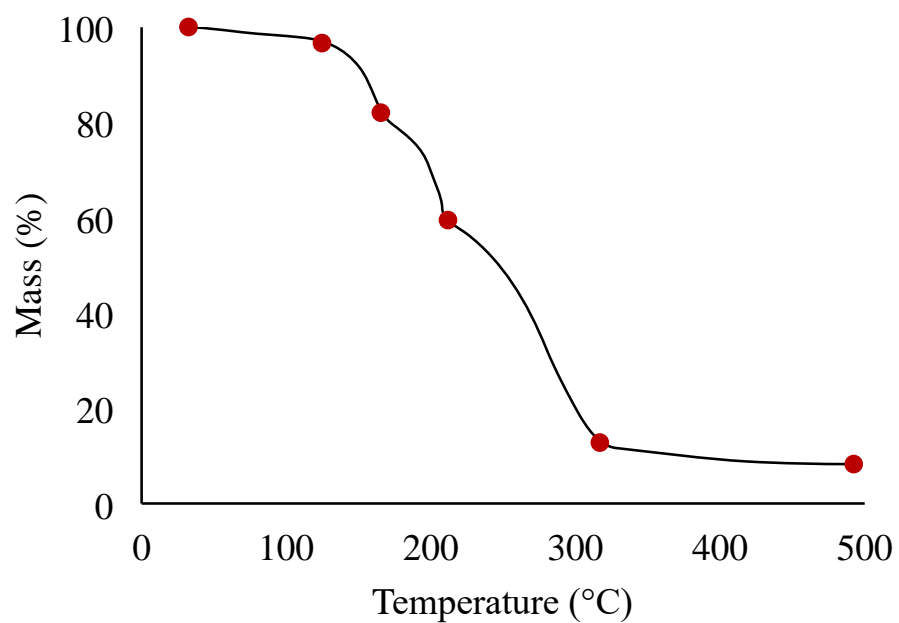

**Figure s5.** TGA trace for  $\Lambda$ -[Co(en)<sub>3</sub>]<sup>3+</sup> 3BARF<sup>-</sup>.

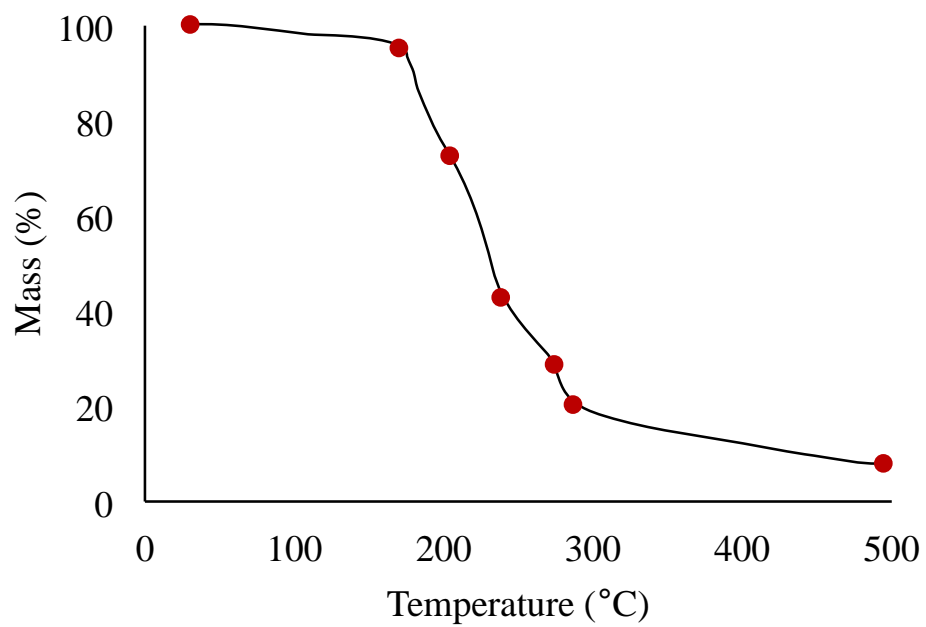

**Figure s6.** TGA trace for  $\Lambda$ -[Rh(en)<sub>3</sub>]<sup>3+</sup> 3BARF<sup>-</sup>.

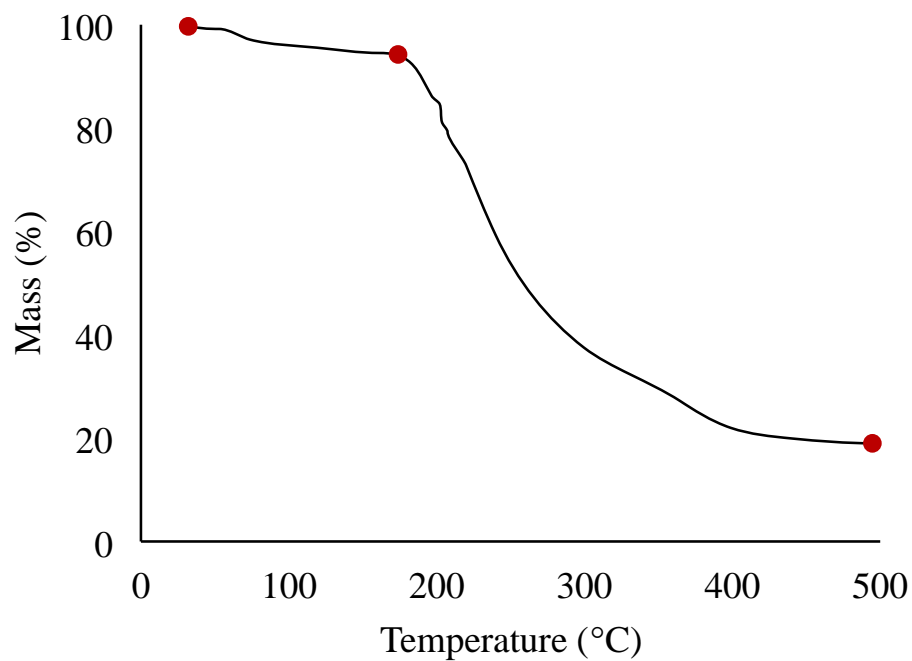

**Figure s7.** TGA trace for  $\Lambda$ -[Ir(en)<sub>3</sub>]<sup>3+</sup> 3BAR<sub>f</sub><sup>-</sup>.

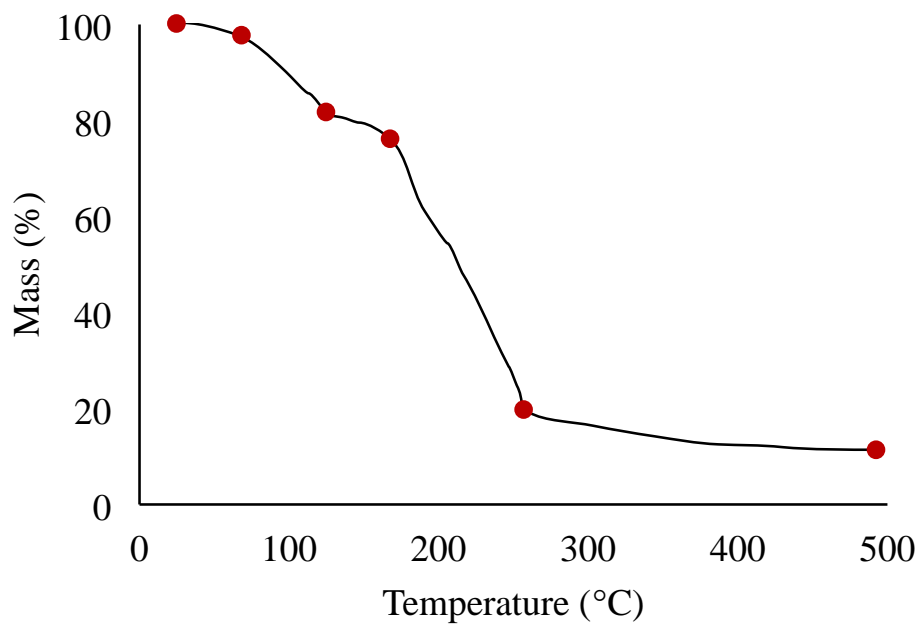

**Figure s8.** TGA trace for  $\Lambda$ -[Pt(en)<sub>3</sub>]<sup>4+</sup> 4BAR<sub>f</sub><sup>-</sup>.

**Table s1.** Hydration levels (*z*) of isolated chloride and iodide salts  $[M(en)_3]^{n+} nX^- \cdot zH_2O$ .

| $M^{n+}$            | $nX^-$           | <i>z</i>          |
|---------------------|------------------|-------------------|
| <i>rac</i> -Cr(III) | 3Cl <sup>-</sup> | 3 <sup>a</sup>    |
| <i>rac</i> -Cr(III) | 3Cl <sup>-</sup> | 3 <sup>b</sup>    |
| Λ-Cr(III)           | 3Cl <sup>-</sup> | 1.6 <sup>c</sup>  |
| Λ-Cr(III)           | 3Cl <sup>-</sup> | 2 <sup>b</sup>    |
| <i>rac</i> -Cr(III) | 3Cl <sup>-</sup> | 3.72 <sup>d</sup> |
| <i>rac</i> -Cr(III) | 3I <sup>-</sup>  | 0 <sup>b</sup>    |
| <i>rac</i> -Co(III) | 3Cl <sup>-</sup> | 4 <sup>d</sup>    |
| <i>rac</i> -Co(III) | 3Cl <sup>-</sup> | 2.8 <sup>b</sup>  |
| Λ-Co(III)           | 3Cl <sup>-</sup> | 0 <sup>b</sup>    |
| Λ-Co(III)           | 3I <sup>-</sup>  | 1 <sup>e</sup>    |
| <i>rac</i> -Co(III) | 3I <sup>-</sup>  | 1 <sup>b</sup>    |
| <i>rac</i> -Co(III) | 3I <sup>-</sup>  | 0 <sup>f</sup>    |
| Λ-Rh(III)           | 3Cl <sup>-</sup> | 2.3 <sup>g</sup>  |
| <i>rac</i> -Rh(III) | 3Cl <sup>-</sup> | 3.37 <sup>d</sup> |
| <i>rac</i> -Rh(III) | 3I <sup>-</sup>  | 0 <sup>f</sup>    |
| Λ-Ir(III)           | 3Cl <sup>-</sup> | 2 <sup>g</sup>    |
| <i>rac</i> -Ir(III) | 3Cl <sup>-</sup> | 3.4 <sup>d</sup>  |
| <i>rac</i> -Ir(III) | 3I <sup>-</sup>  | 0 <sup>f</sup>    |
| <i>rac</i> -Pt(IV)  | 4Cl <sup>-</sup> | 2 <sup>h</sup>    |
| <i>rac</i> -Pt(IV)  | 4Cl <sup>-</sup> | 2.5 <sup>i</sup>  |
| <i>rac</i> -Pt(IV)  | 4Cl <sup>-</sup> | 0 <sup>j</sup>    |
| <i>rac</i> -Pt(IV)  | 4I <sup>-</sup>  | 0 <sup>i</sup>    |

<sup>a</sup>Gillard, R. D.; Mitchell, P. R. *Inorg. Synth.* **1972**, *13*, 184-186. <sup>b</sup>Miller, S. E.; House, D. A. *Inorg. Chim. Acta* **1989**, *157*, 29-32. <sup>c</sup>Galsbøl, F. *Inorg. Synth.* **1970**, *12*, 269-280. <sup>d</sup>Takamizawa, S.; Kohbara, M.; Akatsuka, T.; Miyake, R. *New J. Chem.* **2008**, *32*, 1782-1787. <sup>e</sup>Broomhead, J. A. Dwyer, F. P.; Hogarth, J. W. *Inorg. Synth.* **1960**, *6*, 183-186. <sup>f</sup>Moczygemba, G. A.; Lagowski, J. J. *J. Coord. Chem.* **1976**, *5*, 71-76. <sup>g</sup>Galsbøl, F.; Rasmussen, B. S. *Acta Chem. Scand.* **1982**, *A36*, 83-87. <sup>h</sup>Giedt, D. C.; Nyman, C. J. *Inorg. Synth.* **1966**, *8*, 239-241. <sup>i</sup>Wendlandt, W. *Texas J. Sci.* **1962**, *14*, 264-277. <sup>j</sup>House, J. E., Jr.; Tahir, F. M. *Thermochim. Acta* **1987**, *118*, 191-197.
